# Supplementary material
Source: Research Square preprint supplement (doi:10.21203/rs.3.rs-9740402/v1)

**
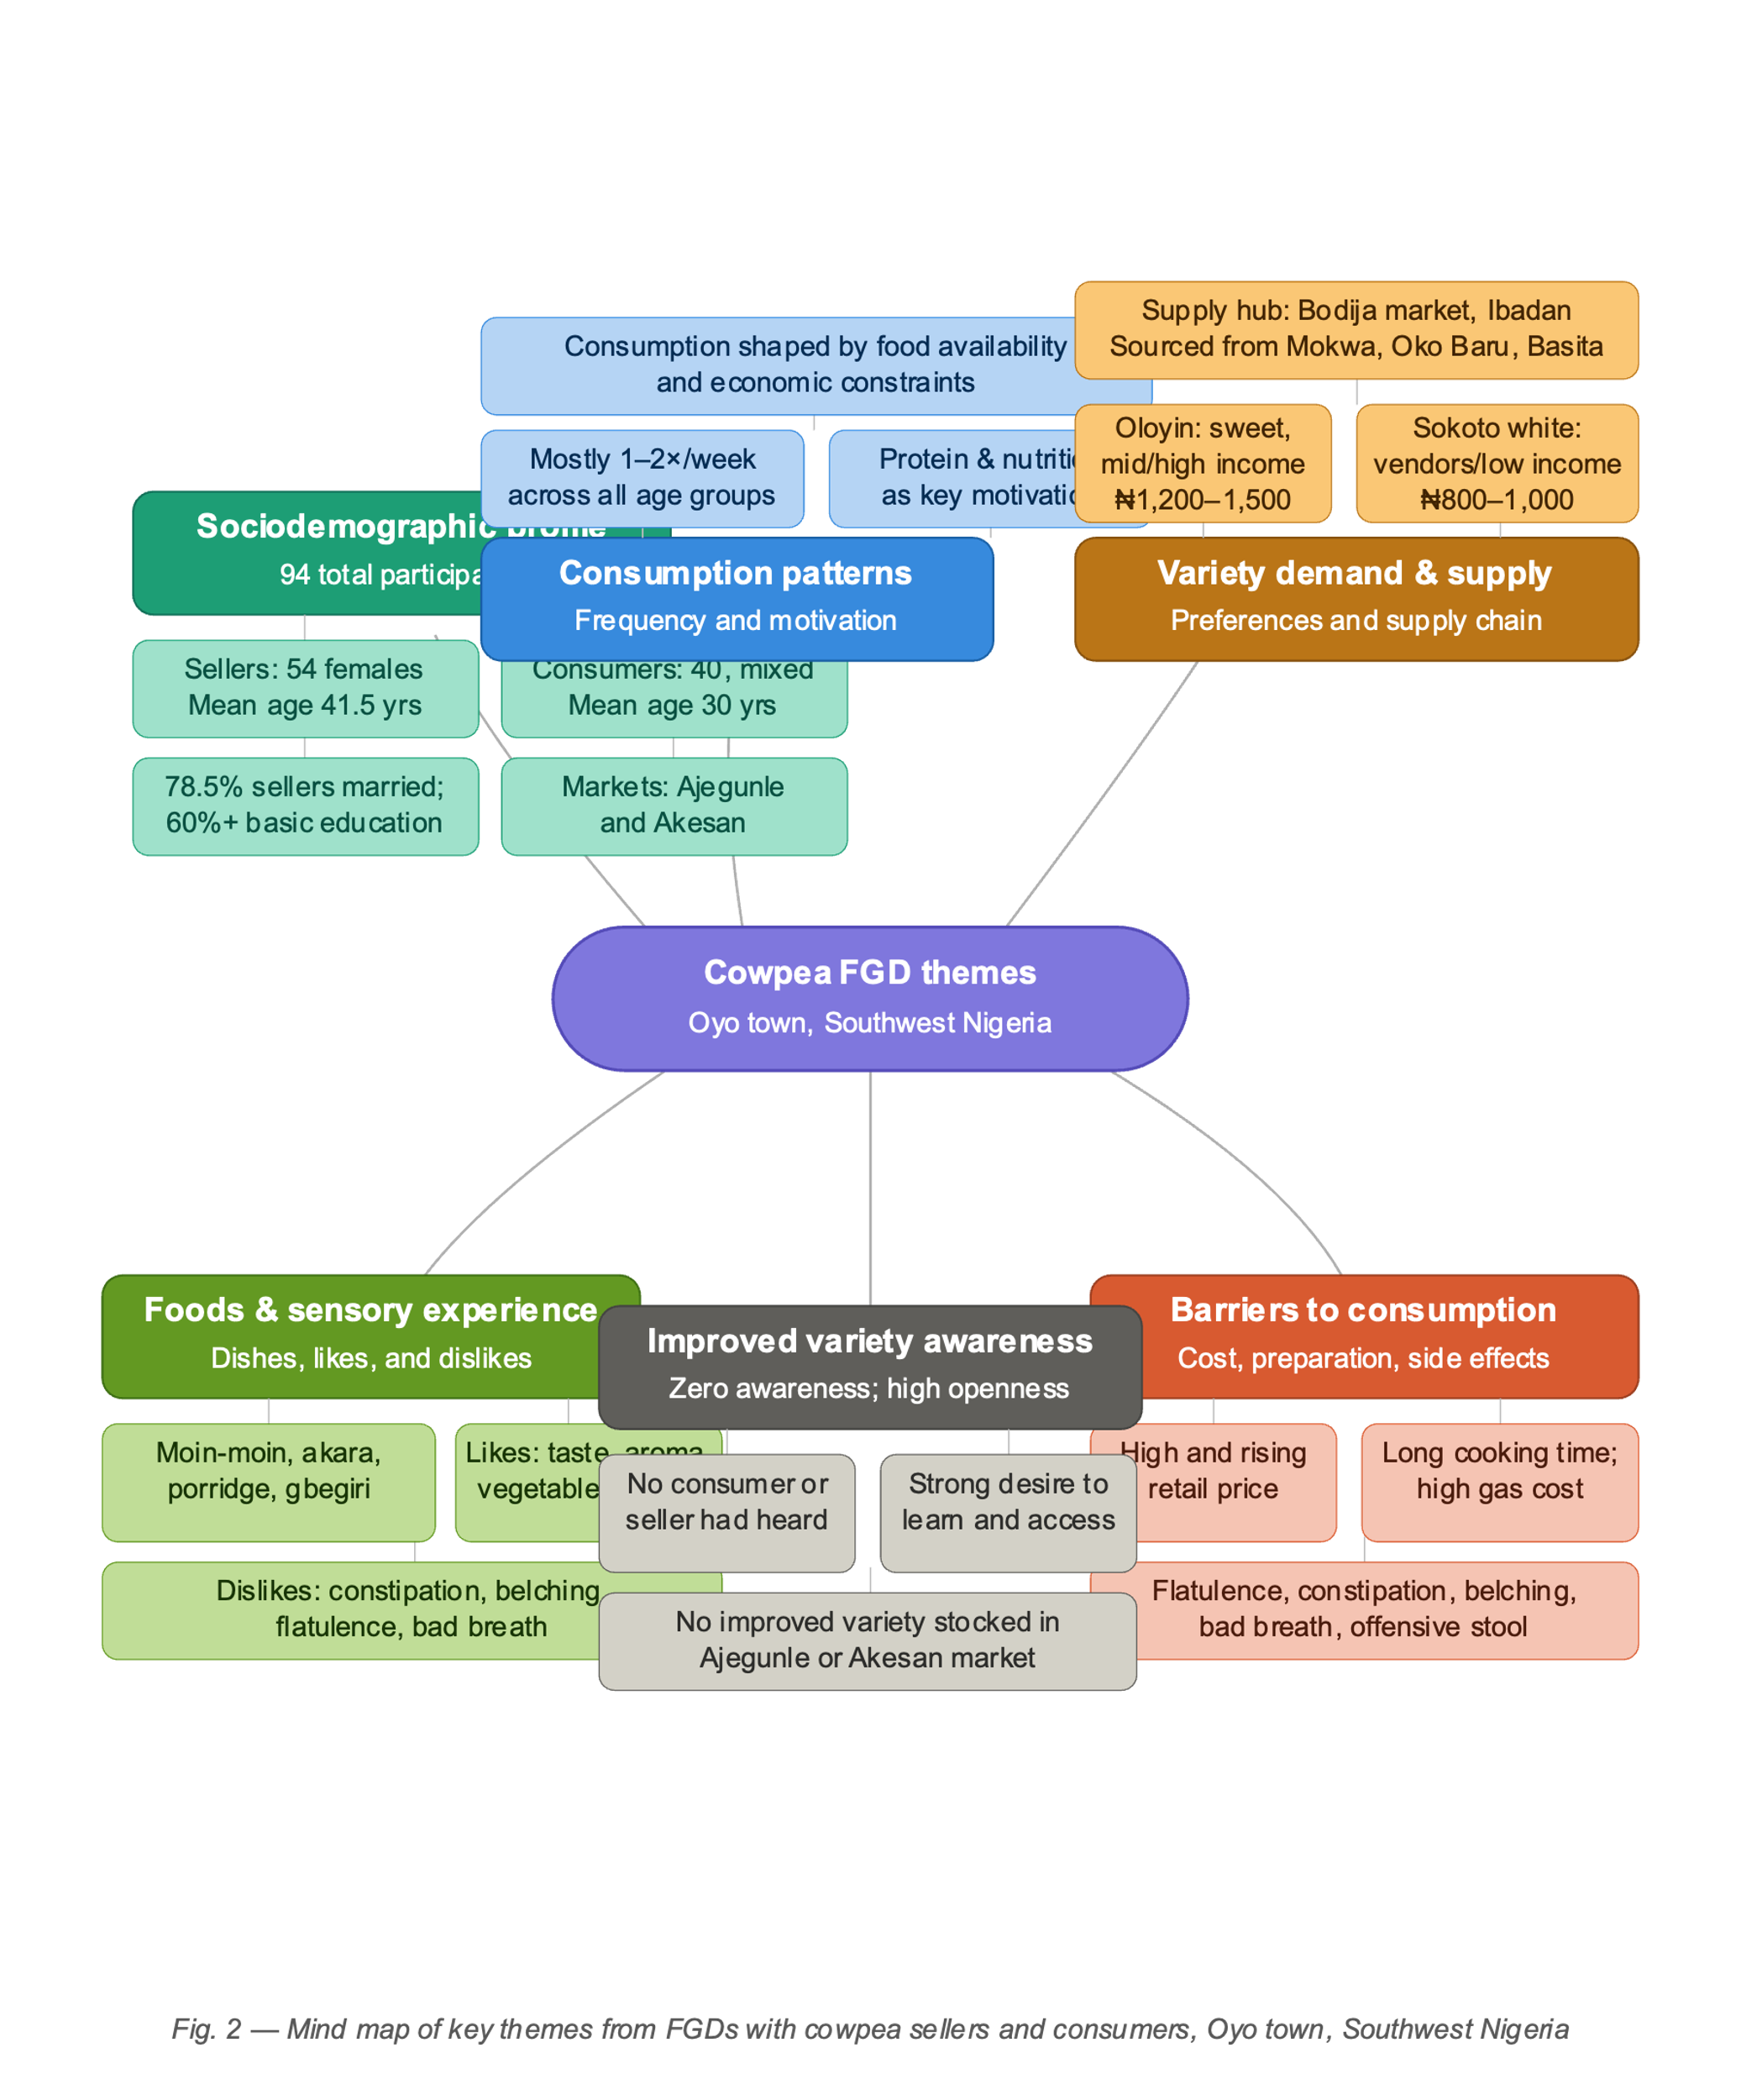
**

Supplement: Supplementary file 1 [file 66b0ff2bbc1b0632eff894e0.docx]
